# Supplementary material for: CircSERPINE2 protects against osteoarthritis by targeting miR-1271 and ETS-related gene
Source: PubMed Central journal article supplement — Ann Rheum Dis. 2019 Mar 28;78(6):826–36. doi: 10.1136/annrheumdis-2018-214786 (PMC6579553; doi:10.1136/annrheumdis-2018-214786), 2019-03-28

Figure 2F

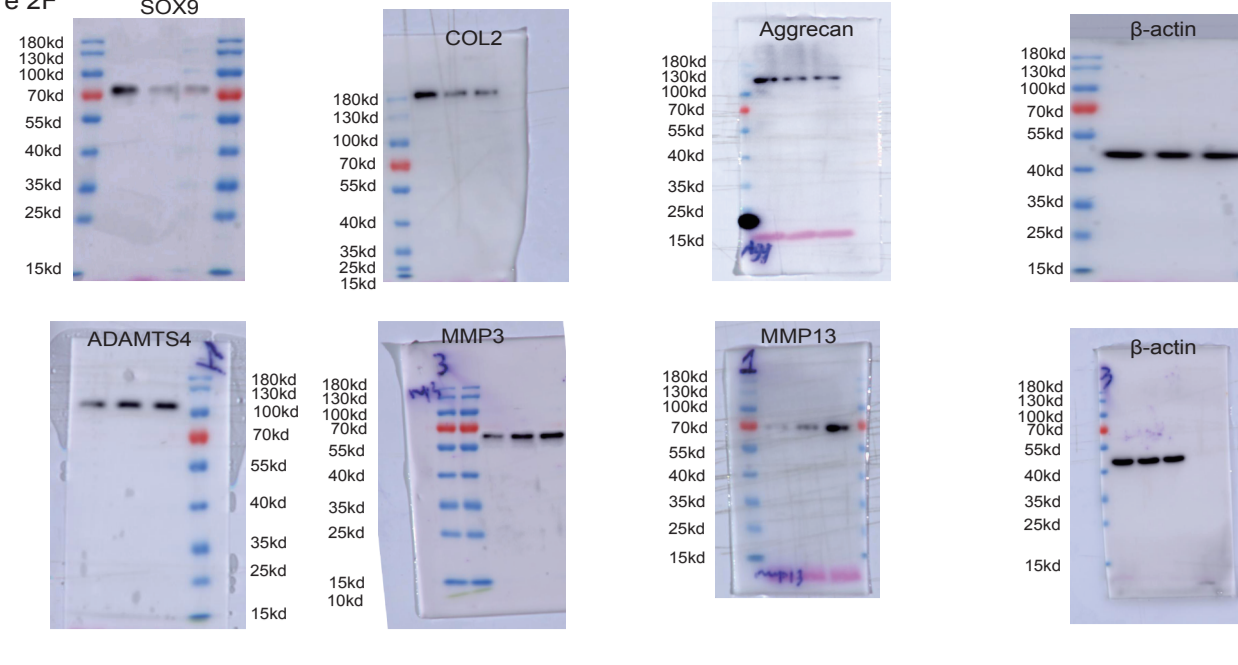

Figure 3J

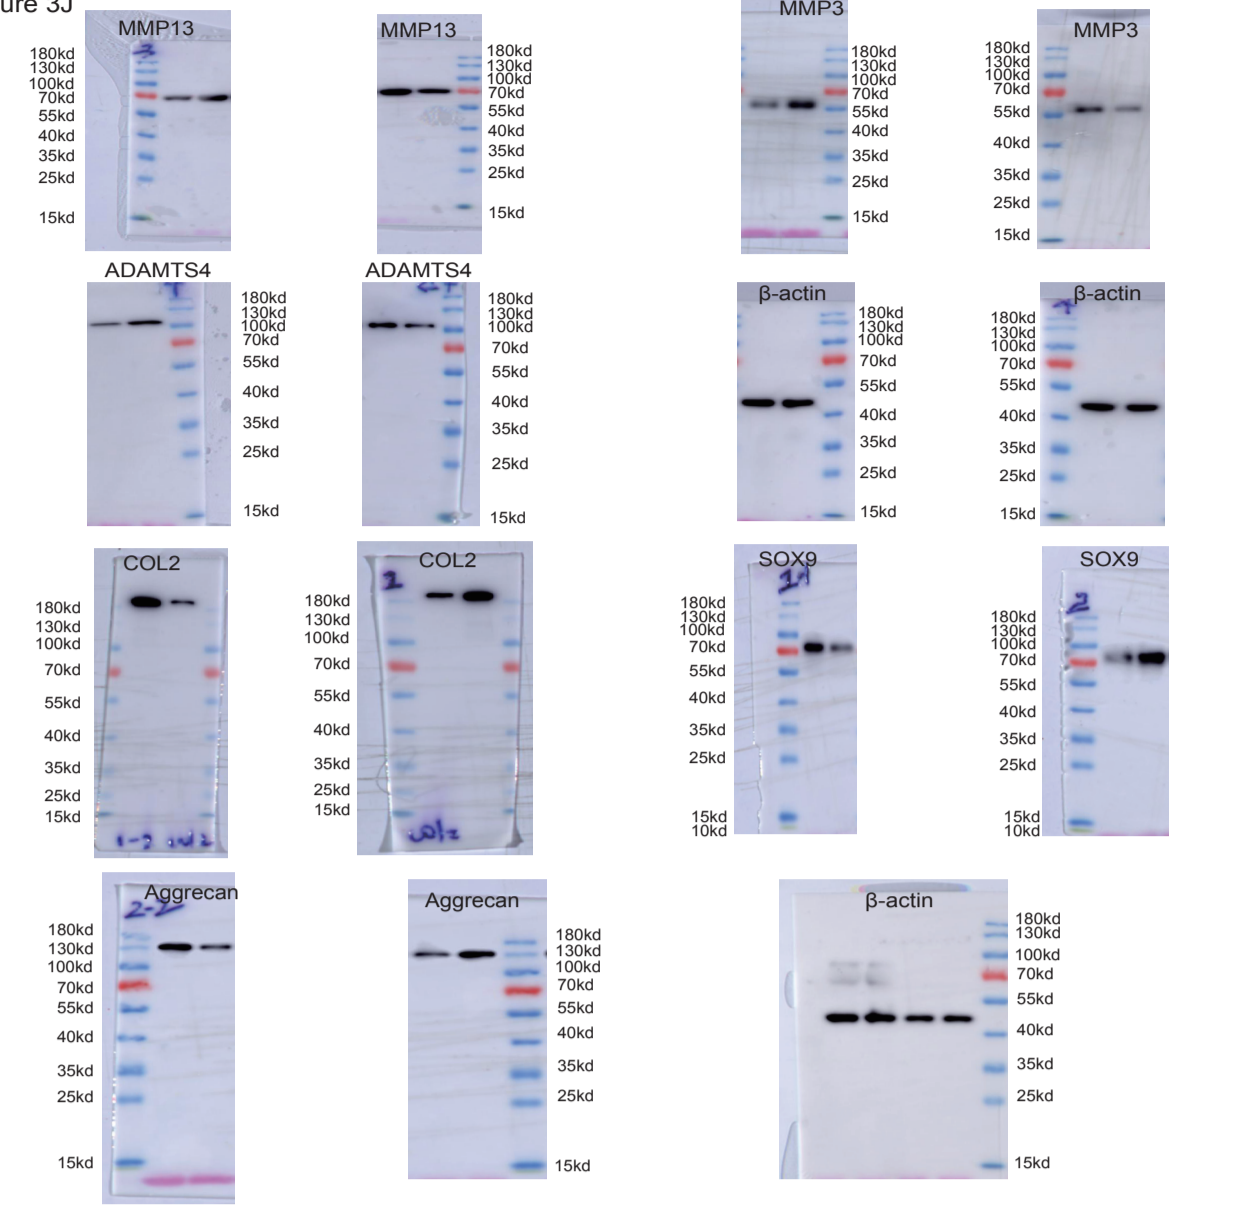

Figure 4B

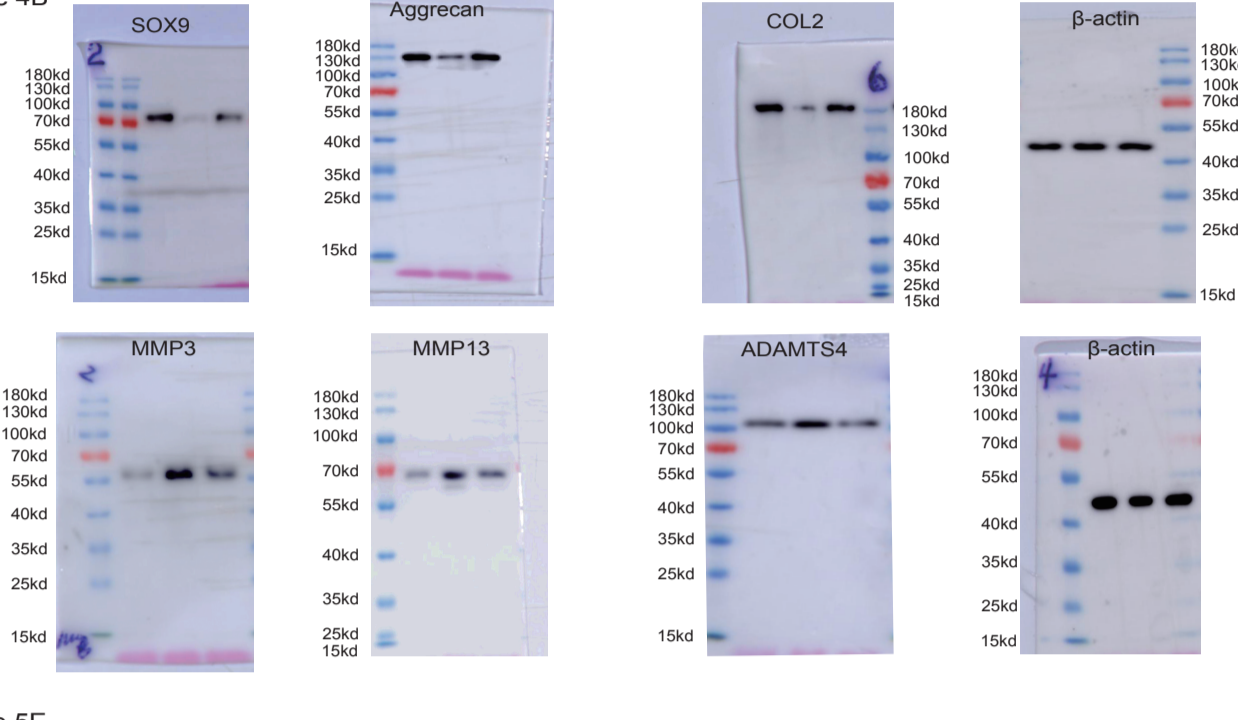

Figure 5E

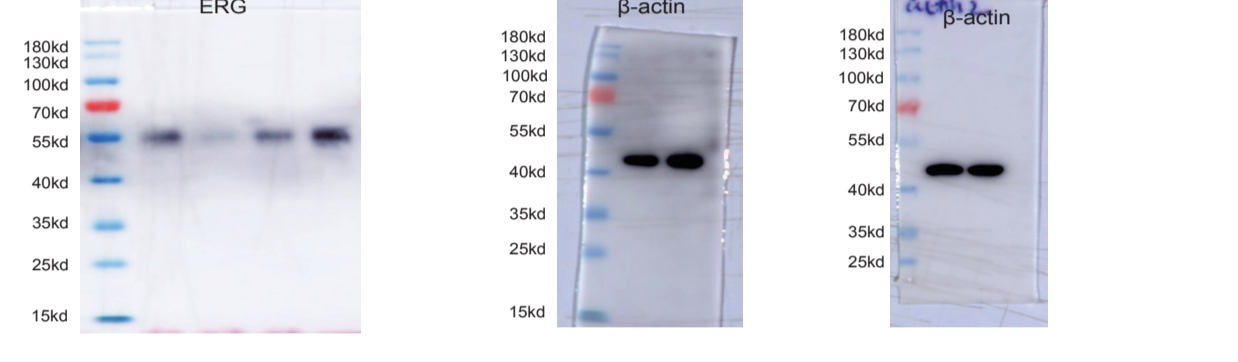

Figure 5G

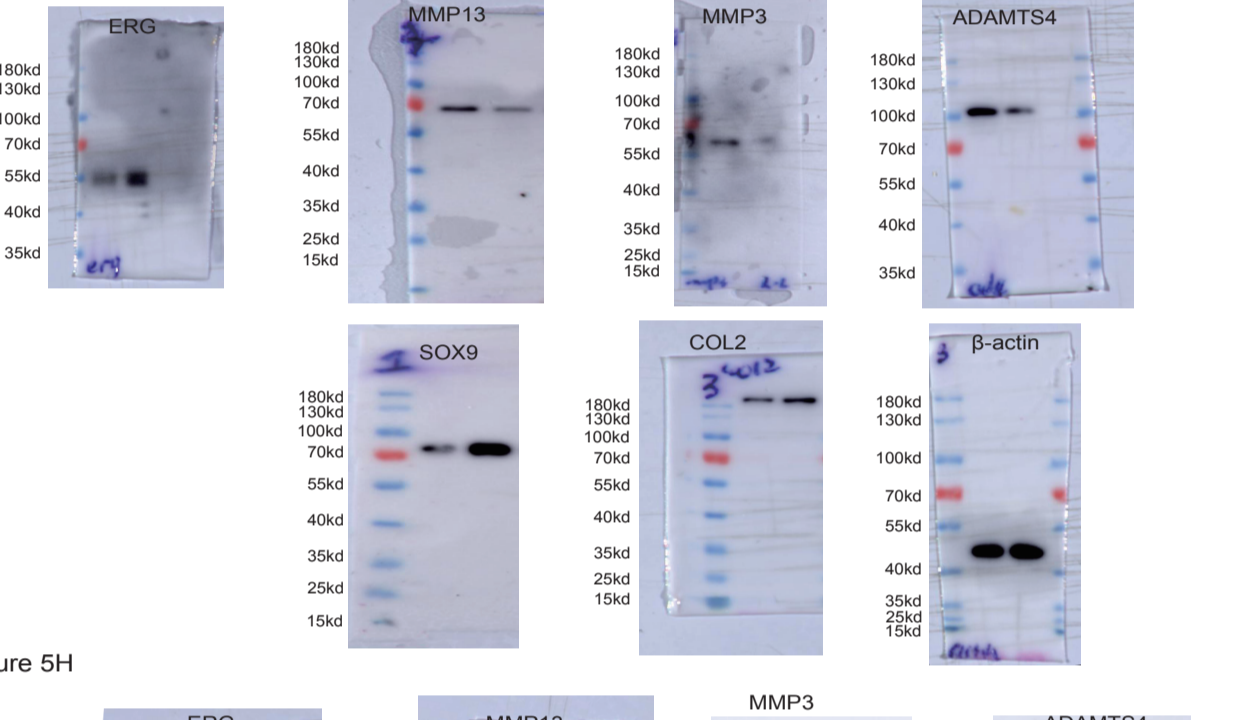

Figure 5H

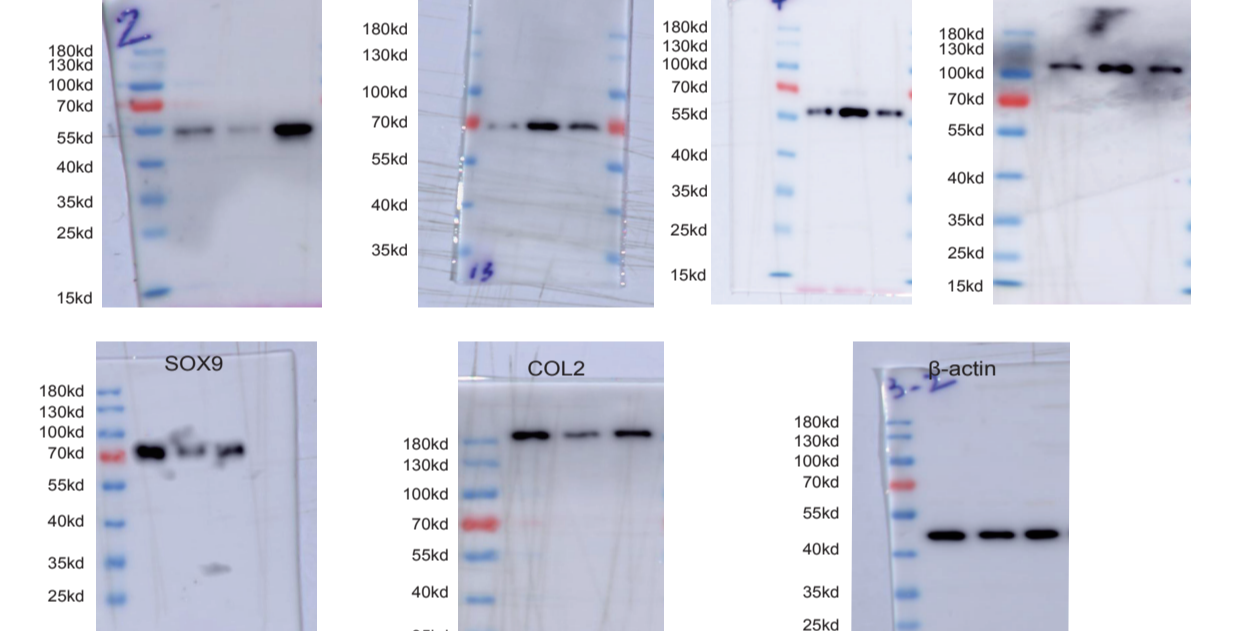

Figure 6D

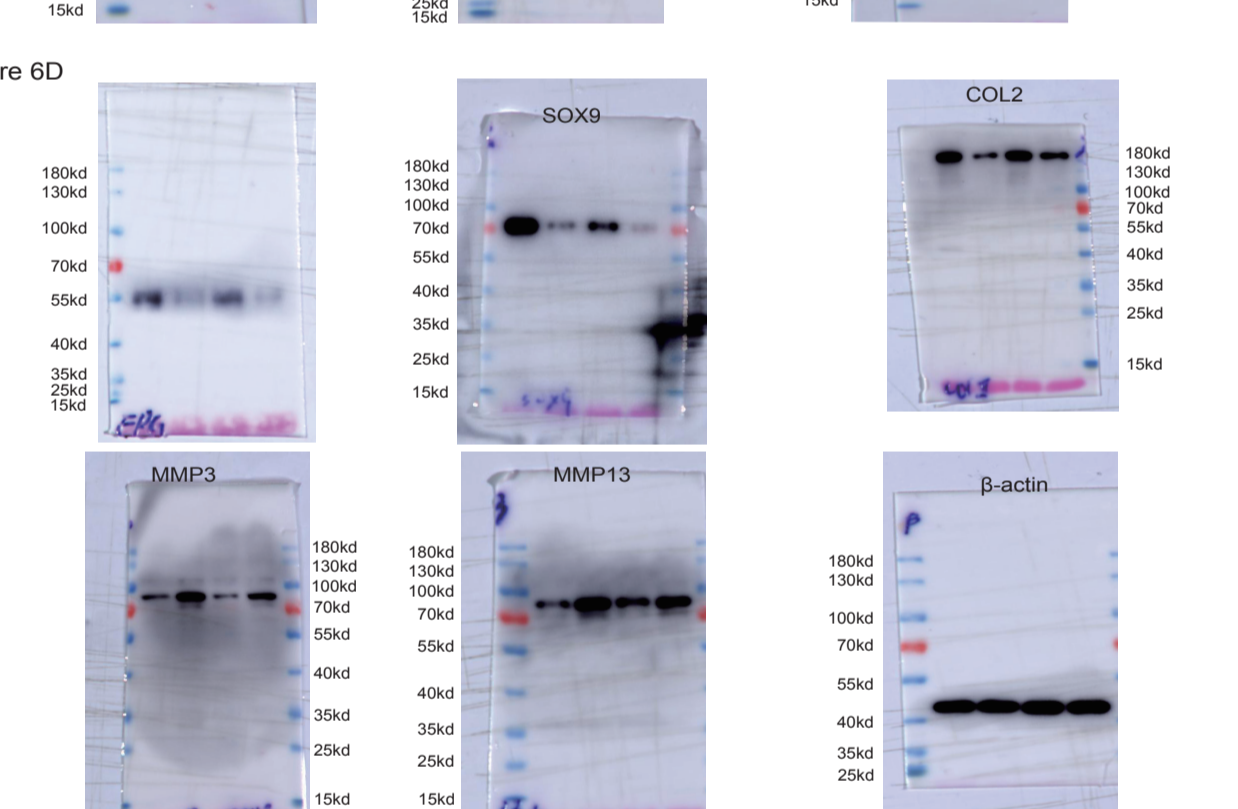

Supplementary Figure S2B

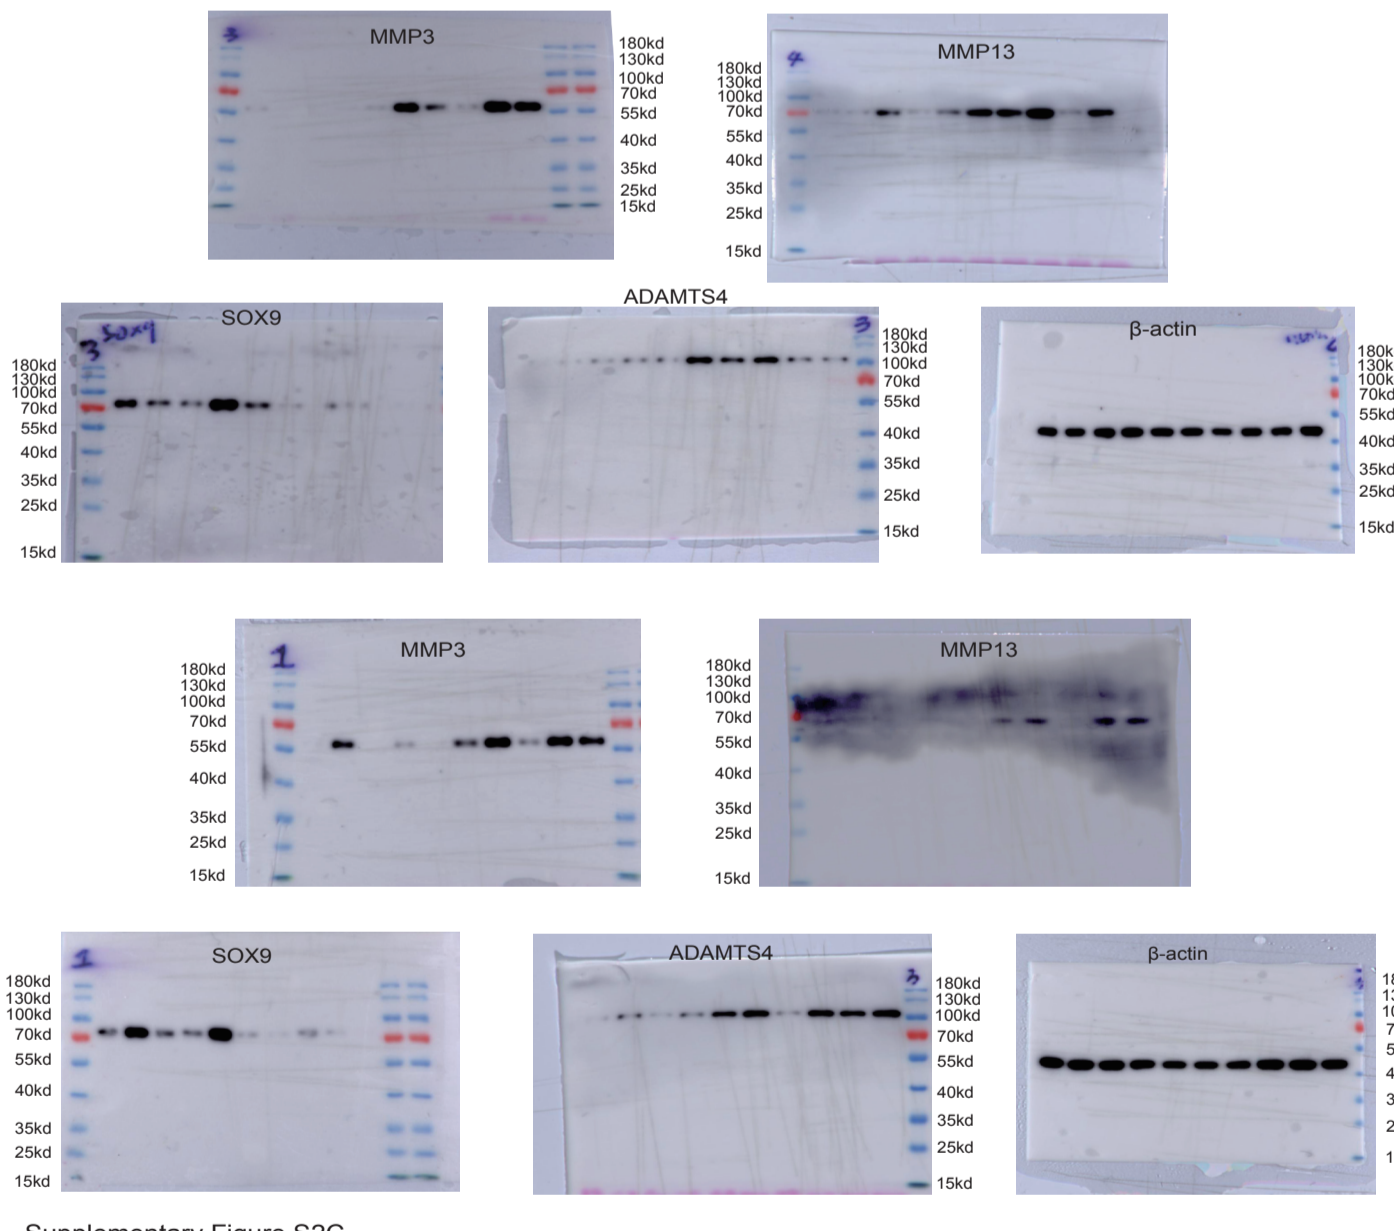

Supplementary Figure S2C

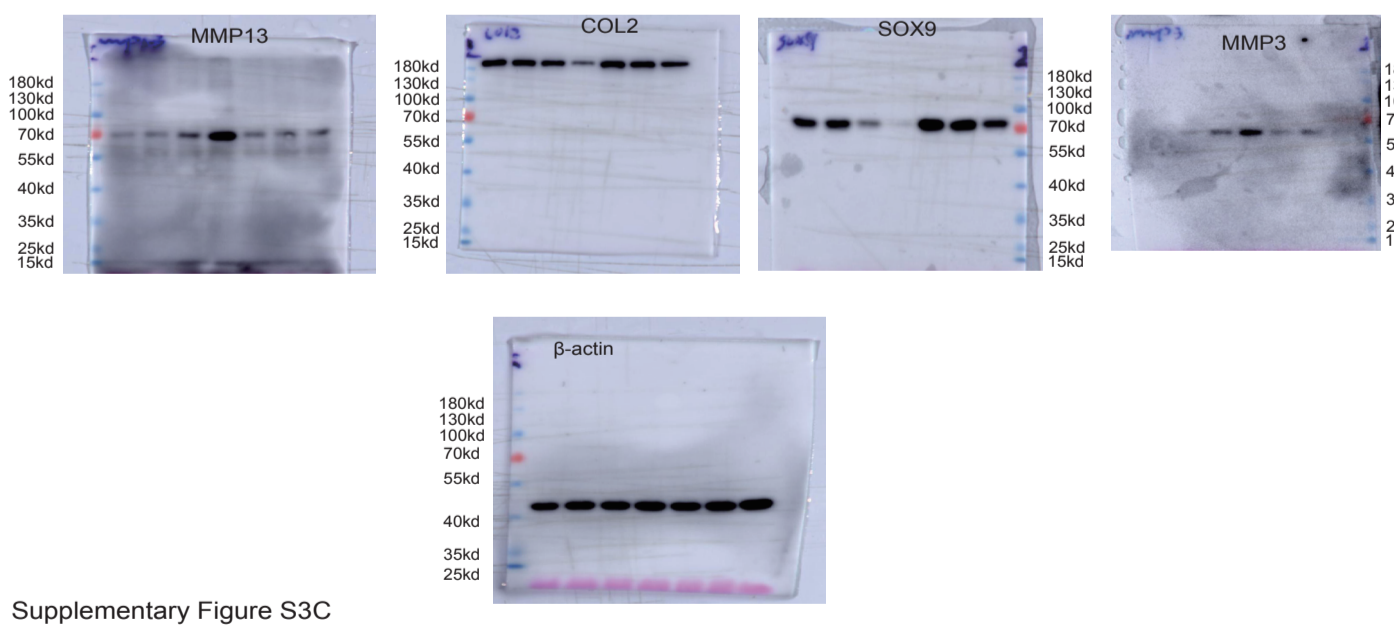

Supplementary Figure S3C

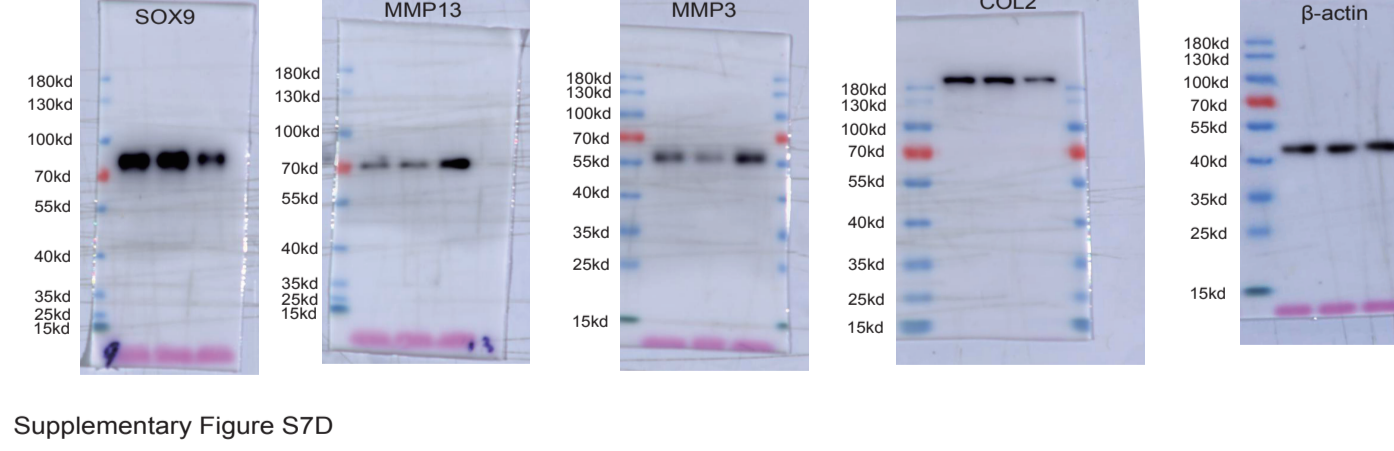

Supplementary Figure S7D

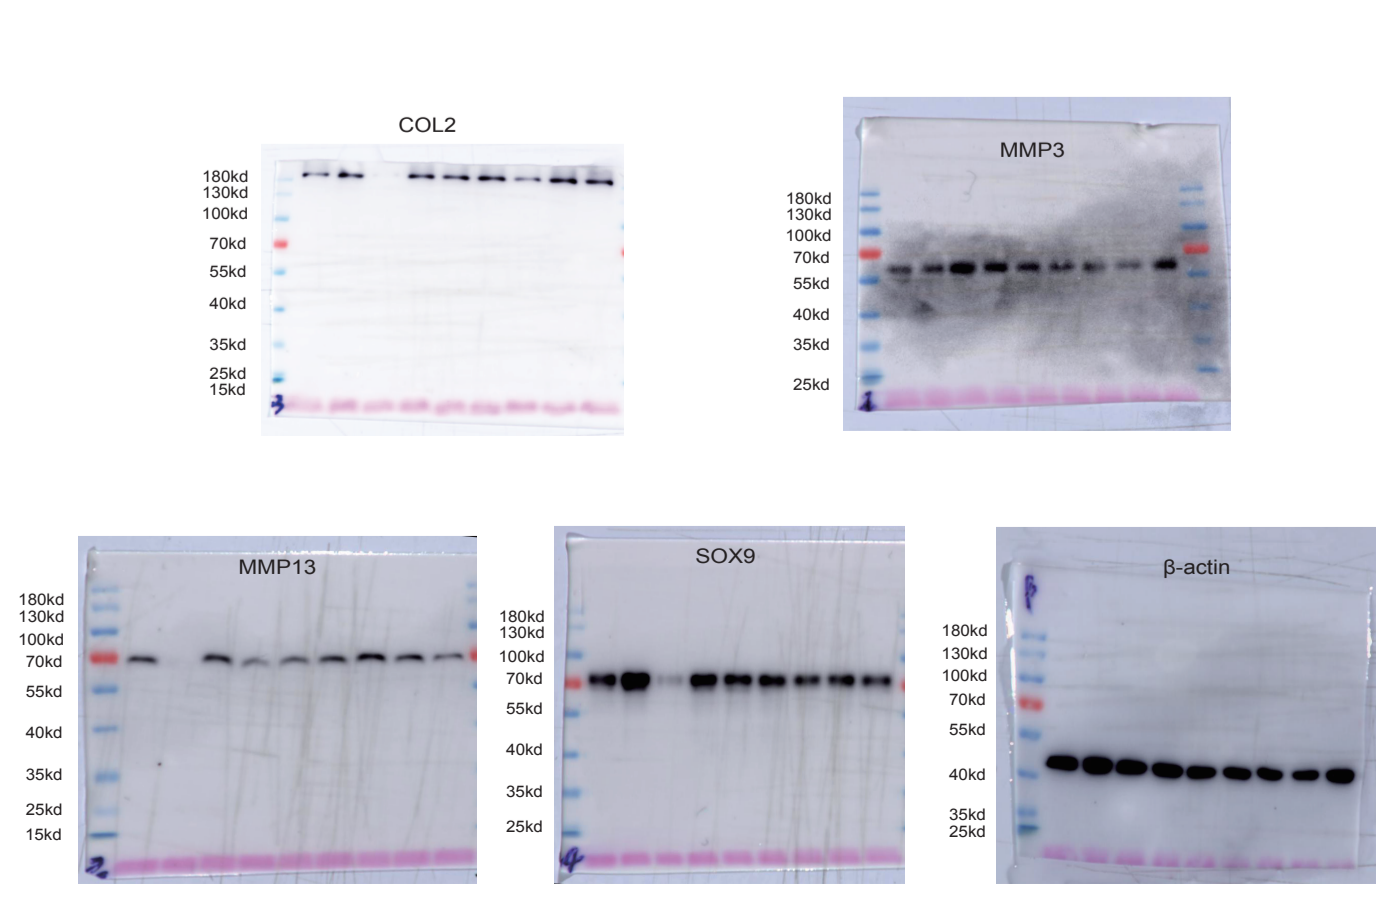

Supplement: annrheumdis-2018-214786supp014.pdf [file annrheumdis-2018-214786supp014.pdf]
